# Supplementary material
Source: PubMed Central journal article supplement (PMC9902257)

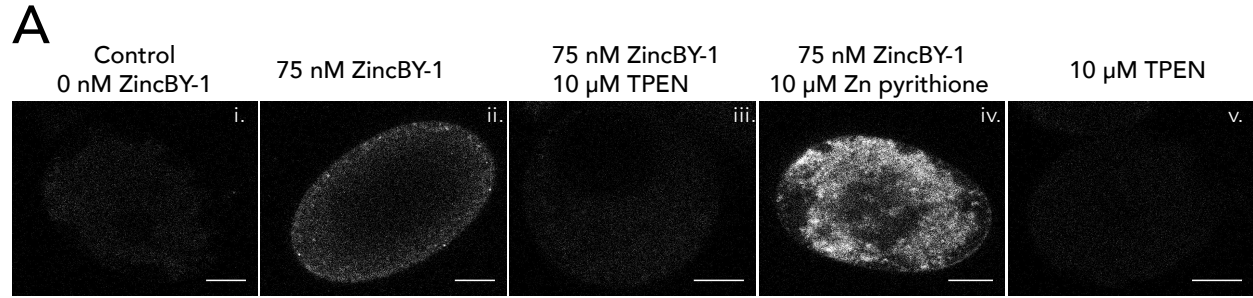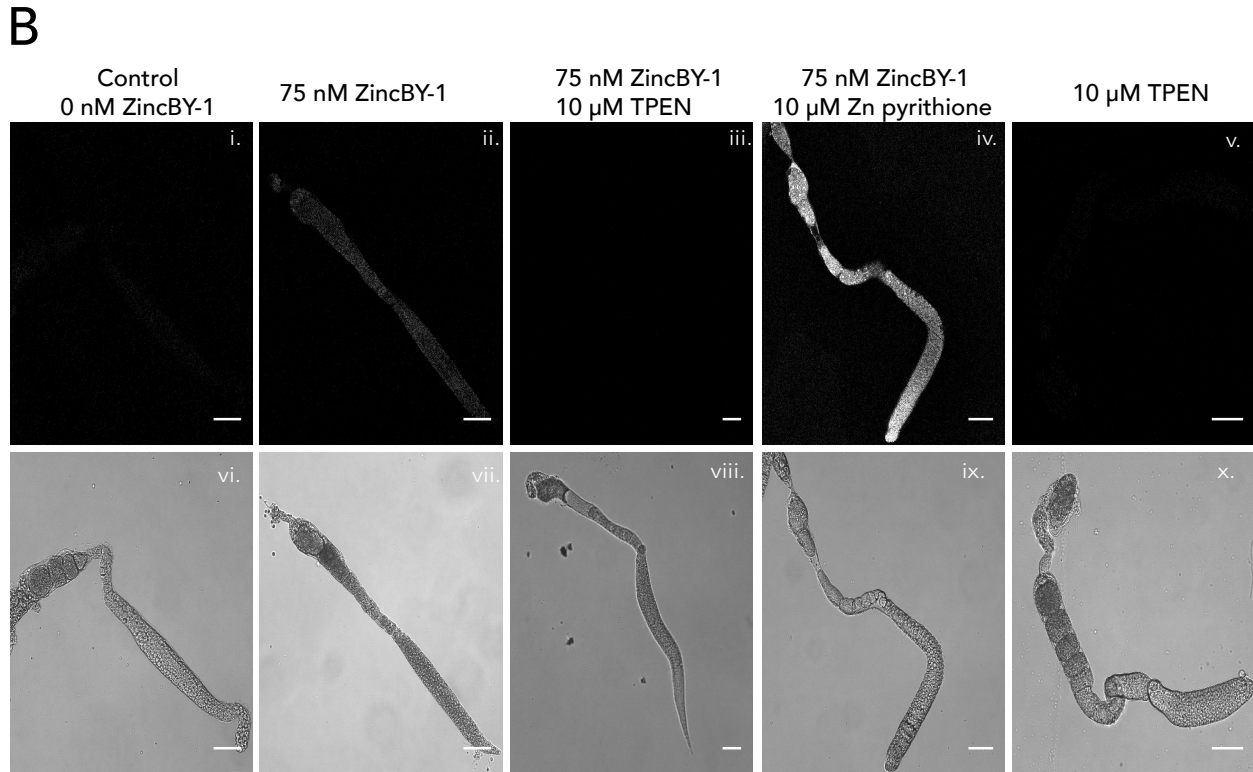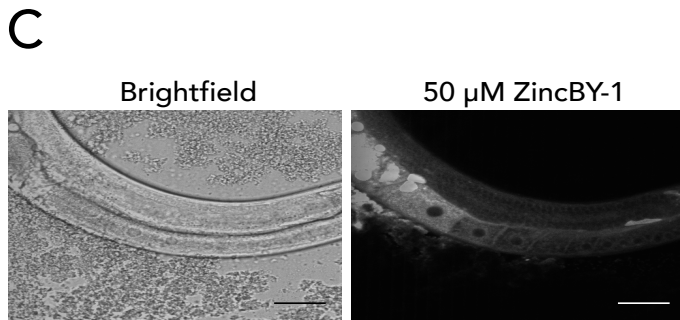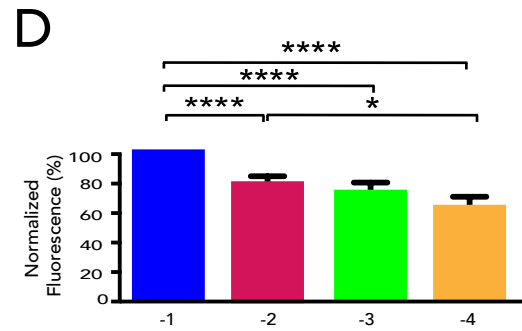

Supplement: final-s1_ioac064.pdf [file final-s1_ioac064.pdf]
